# Supplementary material for: Neural computations underlying strategic social decision-making in groups
Source: PubMed Central journal article supplement (PMC6872737; doi:10.1038/s41467-019-12937-5), 2019-11-21
Supplement: 41467_2019_12937_MOESM3_ESM.pdf [file 41467_2019_12937_MOESM3_ESM.pdf]

## Reporting Summary

Nature Research wishes to improve the reproducibility of the work that we publish. This form provides structure for consistency and transparency in reporting. For further information on Nature Research policies, see [Authors & Referees](#) and the [Editorial Policy Checklist](#).

### Statistical parameters

When statistical analyses are reported, confirm that the following items are present in the relevant location (e.g. figure legend, table legend, main text, or Methods section).

n/a Confirmed

- The exact sample size ( $n$ ) for each experimental group/condition, given as a discrete number and unit of measurement
- An indication of whether measurements were taken from distinct samples or whether the same sample was measured repeatedly
- The statistical test(s) used AND whether they are one- or two-sided  
*Only common tests should be described solely by name; describe more complex techniques in the Methods section.*
- A description of all covariates tested
- A description of any assumptions or corrections, such as tests of normality and adjustment for multiple comparisons
- A full description of the statistics including central tendency (e.g. means) or other basic estimates (e.g. regression coefficient) AND variation (e.g. standard deviation) or associated estimates of uncertainty (e.g. confidence intervals)
- For null hypothesis testing, the test statistic (e.g.  $F$ ,  $t$ ,  $r$ ) with confidence intervals, effect sizes, degrees of freedom and  $P$  value noted  
*Give  $P$  values as exact values whenever suitable.*
- For Bayesian analysis, information on the choice of priors and Markov chain Monte Carlo settings
- For hierarchical and complex designs, identification of the appropriate level for tests and full reporting of outcomes
- Estimates of effect sizes (e.g. Cohen's  $d$ , Pearson's  $r$ ), indicating how they were calculated
- Clearly defined error bars  
*State explicitly what error bars represent (e.g. SD, SE, CI)*

*Our web collection on [statistics for biologists](#) may be useful.*

### Software and code

Policy information about [availability of computer code](#)

Data collection

Brain Imaging was performed on a 3T Philips Achieva MRI scanner. The stimuli presentation was made using Presentation software (14.0).

Data analysis

Behavioral data was analyzed using Matlab 2016a. The computational modeling was performed using Matlab 2016a. Brain imaging data were analyzed using SPM8 in combination with Matlab 2016a.

For manuscripts utilizing custom algorithms or software that are central to the research but not yet described in published literature, software must be made available to editors/reviewers upon request. We strongly encourage code deposition in a community repository (e.g. GitHub). See the Nature Research [guidelines for submitting code & software](#) for further information.

### Data

Policy information about [availability of data](#)

All manuscripts must include a [data availability statement](#). This statement should provide the following information, where applicable:

- Accession codes, unique identifiers, or web links for publicly available datasets
- A list of figures that have associated raw data
- A description of any restrictions on data availability

Anonymized behavioral data and the codes that support the findings are available in the repository in center for open science, <https://osf.io/rdvsz/>

## Field-specific reporting

Please select the best fit for your research. If you are not sure, read the appropriate sections before making your selection.

Life sciences  Behavioural & social sciences  Ecological, evolutionary & environmental sciences

For a reference copy of the document with all sections, see [nature.com/authors/policies/ReportingSummary-flat.pdf](https://nature.com/authors/policies/ReportingSummary-flat.pdf)

## Life sciences study design

All studies must disclose on these points even when the disclosure is negative.

|                 |                                                                                                                                                                                       |
|-----------------|---------------------------------------------------------------------------------------------------------------------------------------------------------------------------------------|
| Sample size     | We used a sample size greater than the norm for the field ( $n=25 > 20$ ). Moreover, our results are not depends on the individual differences across participants.                   |
| Data exclusions | We originally recruited 30 participants. Because of excessive head movement and responses in the post-scanning questionnaire, data of five participant was not included for analysis. |
| Replication     | We replicated the behavioral parameters using cross-validation. We used independent samples to estimate the parameters and predict the behavior with the test set.                    |
| Randomization   | Subjects were not allocated to different treatment groups. All experimental conditions were presented randomly interleaved.                                                           |
| Blinding        | The within-subject design that we used in this study did not require blinding.                                                                                                        |

## Reporting for specific materials, systems and methods

### Materials & experimental systems

|                                     |                                                                 |
|-------------------------------------|-----------------------------------------------------------------|
| n/a                                 | Included in the study                                           |
| <input checked="" type="checkbox"/> | <input type="checkbox"/> Unique biological materials            |
| <input checked="" type="checkbox"/> | <input type="checkbox"/> Antibodies                             |
| <input checked="" type="checkbox"/> | <input type="checkbox"/> Eukaryotic cell lines                  |
| <input checked="" type="checkbox"/> | <input type="checkbox"/> Palaeontology                          |
| <input checked="" type="checkbox"/> | <input type="checkbox"/> Animals and other organisms            |
| <input type="checkbox"/>            | <input checked="" type="checkbox"/> Human research participants |

### Methods

|                                     |                                                            |
|-------------------------------------|------------------------------------------------------------|
| n/a                                 | Included in the study                                      |
| <input checked="" type="checkbox"/> | <input type="checkbox"/> ChIP-seq                          |
| <input checked="" type="checkbox"/> | <input type="checkbox"/> Flow cytometry                    |
| <input type="checkbox"/>            | <input checked="" type="checkbox"/> MRI-based neuroimaging |

## Human research participants

Policy information about [studies involving human research participants](#)

|                            |                                                                                                                                                                                                                                                                          |
|----------------------------|--------------------------------------------------------------------------------------------------------------------------------------------------------------------------------------------------------------------------------------------------------------------------|
| Population characteristics | 25 individuals (mean age 22.48 years old $\pm$ 0.33 (SD), 13 women) completed the study. Based on self-reported questionnaires, none of participants reported a history of neurological or psychiatric disorders. All subjects had normal or corrected to normal vision. |
| Recruitment                | Students of University of Parma, Italy were recruited based on advertisement flyers.                                                                                                                                                                                     |

## Magnetic resonance imaging

### Experimental design

|                                 |                                                                                                                                                                                                         |
|---------------------------------|---------------------------------------------------------------------------------------------------------------------------------------------------------------------------------------------------------|
| Design type                     | Event-related, randomized trial sequence                                                                                                                                                                |
| Design specifications           | Each subjects completed 12 runs with 15 trials each between two randomly interleaved choice conditions according to the decision threshold, k. The inter trial interval was jittered in 2 to 5 seconds. |
| Behavioral performance measures | In each trial, 1) a binary decision whether to make contribution or free-riding to the group, 2) reaction time, 3) satisfaction rating were measured.                                                   |

## Acquisition

|                               |                                                                                                                                                                                                                                                                                                                                                                                                                                                                                                                                                         |                                              |
|-------------------------------|---------------------------------------------------------------------------------------------------------------------------------------------------------------------------------------------------------------------------------------------------------------------------------------------------------------------------------------------------------------------------------------------------------------------------------------------------------------------------------------------------------------------------------------------------------|----------------------------------------------|
| Imaging type(s)               | T1-weighted MP-rage, T2*-weighted gradient-echo planar imaging                                                                                                                                                                                                                                                                                                                                                                                                                                                                                          |                                              |
| Field strength                | 3 Tesla                                                                                                                                                                                                                                                                                                                                                                                                                                                                                                                                                 |                                              |
| Sequence & imaging parameters | The imaging parameters were as follows: repetition time (TR), 2500 ms; echo time (TE), 30 ms; acceleration factor 2, bandwidth 3906 Hz/PIXEL matrix 96x96, field of view (FOV), 205 × 205 mm <sup>2</sup> ; 41 contiguous slices were acquired in interleaved order, slice thickness, 2.8 mm + 0.7 mm gap. The imaging parameters for the 3D IR-prepared FSPGR T1 weighted anatomical scan were as follows: TR, 8500 ms; TE, 3.2 ms; FOV, 256 × 256 mm <sup>2</sup> ; matrix 256x256; slice thickness, 1 mm; total slices, 156, bandwidth 244 Hz/PIXEL. |                                              |
| Area of acquisition           | Whole-brain                                                                                                                                                                                                                                                                                                                                                                                                                                                                                                                                             |                                              |
| Diffusion MRI                 | <input type="checkbox"/> Used                                                                                                                                                                                                                                                                                                                                                                                                                                                                                                                           | <input checked="" type="checkbox"/> Not used |

## Preprocessing

|                            |                                                                                                                                                                                                                                                                                                                                            |  |
|----------------------------|--------------------------------------------------------------------------------------------------------------------------------------------------------------------------------------------------------------------------------------------------------------------------------------------------------------------------------------------|--|
| Preprocessing software     | SPM8                                                                                                                                                                                                                                                                                                                                       |  |
| Normalization              | Each structural image was segmented into gray matter, white matter and cerebral spinal fluid images using a nonlinear deformation field and mapped on a template. The deformations were further applied to both structural and functional images to create new images spatially normalized to Montreal Neurological Institute (MNI) space. |  |
| Normalization template     | SPM8 MNI template                                                                                                                                                                                                                                                                                                                          |  |
| Noise and artifact removal | 6 motion correction parameters were estimated from the realignment procedure and were entered as nuisance covariates. The onset time of any button press was entered as stick function to remove the potential motion effects.                                                                                                             |  |
| Volume censoring           | A participant who had more than 3mm movement from an EPI to the next image was not included for the analysis.                                                                                                                                                                                                                              |  |

## Statistical modeling &amp; inference

|                                                                           |                                                                                                                                                                                                                                                                                                                  |  |
|---------------------------------------------------------------------------|------------------------------------------------------------------------------------------------------------------------------------------------------------------------------------------------------------------------------------------------------------------------------------------------------------------|--|
| Model type and settings                                                   | Mass univariate; fixed-effects within subject to combine fMRI data across runs; random-effects across subjects for second-level analyses.                                                                                                                                                                        |  |
| Effect(s) tested                                                          | The group level effects was tested with one-sample t-test using SPM8. The statistical inference was conducted using Gaussian random field theory as implemented in SPM8 to obtain clusters satisfying $P < 0.05$ , family-wise error (FWE) corrected at a cluster-defining threshold of $P < 0.001$ uncorrected. |  |
| Specify type of analysis:                                                 | <input checked="" type="checkbox"/> Whole brain <input type="checkbox"/> ROI-based <input type="checkbox"/> Both                                                                                                                                                                                                 |  |
| Statistic type for inference<br>(See <a href="#">Eklund et al. 2016</a> ) | Voxel-wise inference                                                                                                                                                                                                                                                                                             |  |
| Correction                                                                | The clusters satisfying $P < 0.05$ , family-wise error (FWE) corrected at a cluster-defining threshold of $P < 0.001$ uncorrected.                                                                                                                                                                               |  |

## Models &amp; analysis

|                                          |                                                                              |
|------------------------------------------|------------------------------------------------------------------------------|
| n/a                                      | Involvement in the study                                                     |
| <input type="checkbox"/>                 | <input checked="" type="checkbox"/> Functional and/or effective connectivity |
| <input checked="" type="checkbox"/>      | <input type="checkbox"/> Graph analysis                                      |
| <input checked="" type="checkbox"/>      | <input type="checkbox"/> Multivariate modeling or predictive analysis        |
| Functional and/or effective connectivity | The Psycho-Physiological Interaction (PPI) was conducted using SPM8          |
